# Supplementary material for: Integrated Collection of Stem Cell Bank Data, a Data Portal for Standardized Stem Cell Information
Source: PubMed Central journal article supplement (PMC8072026; doi:10.1016/j.stemcr.2021.02.014), 2021-03-18
Supplement: mmc1.pdf [file mmc1.pdf]

**Stem Cell Reports, Volume 16**

## **Supplemental Information**

### **Integrated Collection of Stem Cell Bank Data, a Data Portal for Standardized Stem Cell Information**

**Ying Chen, Kunie Sakurai, Sumihiro Maeda, Tohru Masui, Hideyuki Okano, Johannes Dewender, Stefanie Seltmann, Andreas Kurtz, Hiroshi Masuya, Yukio Nakamura, Michael Sheldon, Juliane Schneider, Glyn N. Stacey, Yulia Panina, and Wataru Fujibuchi**

**SUPPLEMENTAL FIGURES**

**Fig S1. Related to Figure 2.**

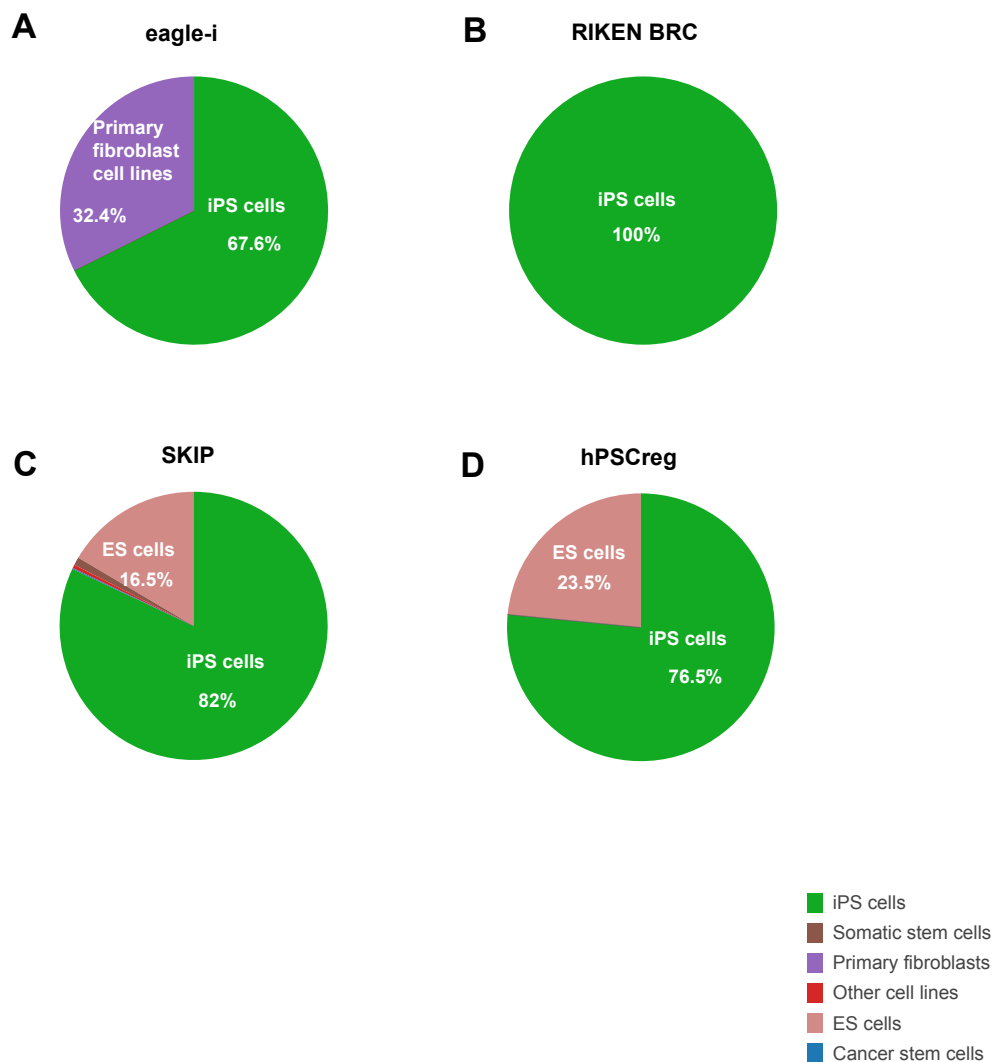

**Fig S1. Details of cell line types collected by eagle-i, RIKEN BRC, SKIP, and hPSCreg (as of December 6, 2020). (A) eagle-i, (B) RIKEN BRC, (C) SKIP, and (D) hPSCreg.**

**Fig S2. Related to Figure 2.**

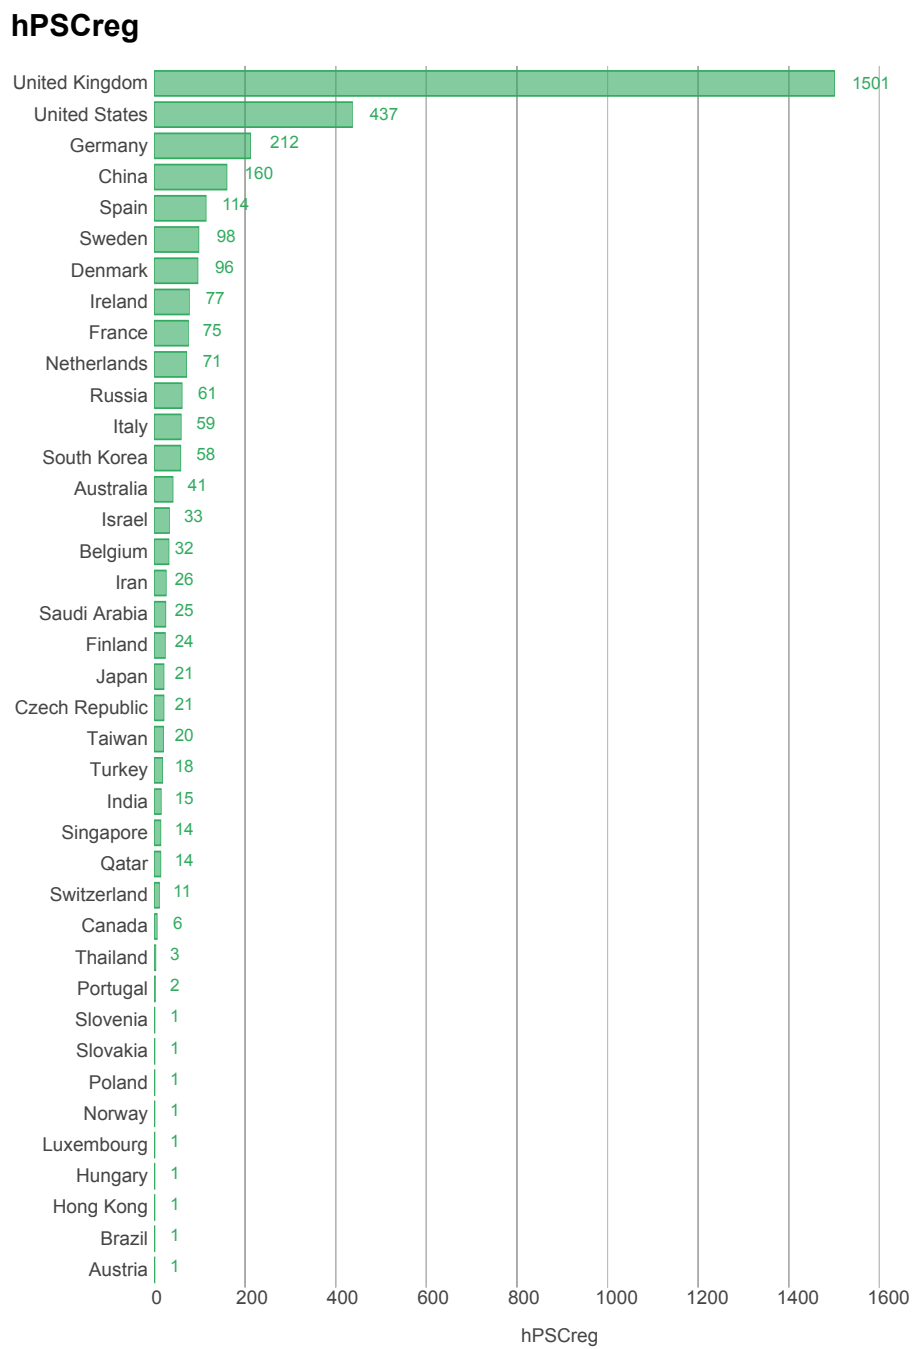

**Fig S2. Details of countries that have established cell lines in hPSCreg (as of December 6, 2020).**

Fig S3. Related to Figure 2.

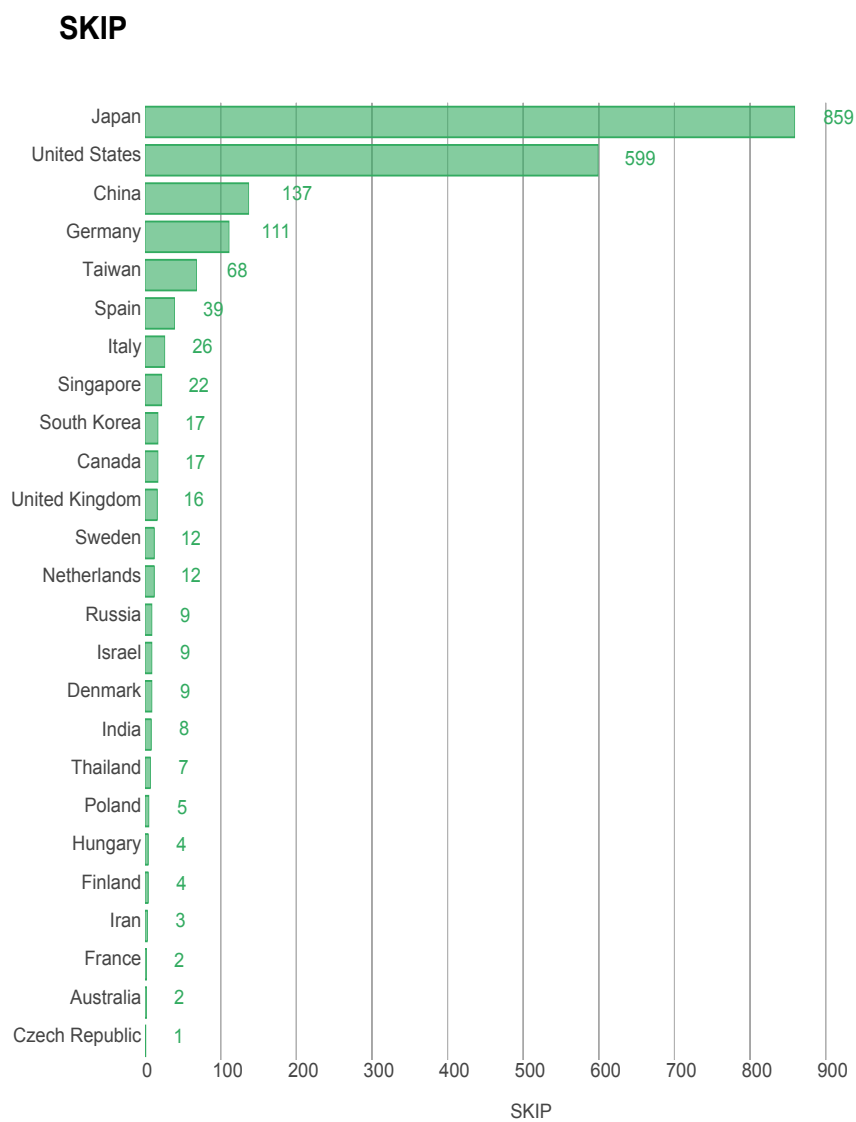

Fig S3. Details of countries that have established cell lines in SKIP (as of December 6, 2020).

**SUPPLEMENTAL TABLES**

**Table S1. Related to Figure 5.** (submitted as separate Excel file)

**Table S1. List of full information of ICSCB** (as of December 6, 2020).

**Table S2. Related to Figure 2A and Figure S1.**

| <b>Stem_cell_type</b>         | <b>hPSCreg</b> | <b>SKIP</b> | <b>RIKEN BRC</b> |
|-------------------------------|----------------|-------------|------------------|
| ES cells                      | 788            | 927         | 0                |
| iPS cells                     | 2572           | 4603        | 3548             |
| Somatic stem cells            | 0              | 54          | 0                |
| Cancer stem cells             | 0              | 7           | 0                |
| Primary fibroblast cell lines | 0              | 0           | 0                |
| Others                        | 0              | 24          | 0                |
| <b>Total</b>                  | <b>3360</b>    | <b>5615</b> | <b>3548</b>      |

**Table S2. List of cell line types across all four databases (as of December 6, 2020).**

**Table S3. Related to Figure 2B.**

| <b>Health_status</b> | <b>Count</b> |
|----------------------|--------------|
| Healthy              | 9708         |
| Diseased             | 6363         |
| <b>Total</b>         | <b>16071</b> |

**Table S3. Statistics of healthy/diseased cell lines in ICSCB (as of December 6, 2020).**

**Table S4. Related to Figure 2C.**

| <b>Country</b> | <b>SKIP</b>  | <b>hPSCreg</b> | <b>Total</b> |
|----------------|--------------|----------------|--------------|
| United Kingdom | 16           | 1501           | 1517         |
| United States  | 599          | 437            | 1036         |
| Japan          | 859          | 21             | 880          |
| Germany        | 111          | 212            | 323          |
| China          | 137          | 160            | 297          |
| Spain          | 39           | 114            | 153          |
| Sweden         | 12           | 98             | 110          |
| Denmark        | 9            | 96             | 105          |
| Taiwan         | 68           | 20             | 88           |
| Italy          | 26           | 59             | 85           |
| Ireland        | 0            | 77             | 77           |
| South Korea    | 17           | 58             | 75           |
| Netherlands    | 12           | 71             | 83           |
| Russia         | 9            | 61             | 70           |
| France         | 2            | 75             | 77           |
| Australia      | 2            | 41             | 43           |
| Israel         | 9            | 33             | 42           |
| Singapore      | 22           | 14             | 36           |
| Belgium        | 0            | 32             | 32           |
| Iran           | 3            | 26             | 29           |
| Canada         | 17           | 6              | 23           |
| Finland        | 4            | 24             | 28           |
| Czech Republic | 1            | 21             | 22           |
| India          | 8            | 15             | 23           |
| Turkey         | 0            | 18             | 18           |
| Qatar          | 0            | 14             | 14           |
| Switzerland    | 0            | 11             | 11           |
| Thailand       | 7            | 3              | 10           |
| Hungary        | 4            | 1              | 5            |
| Poland         | 5            | 1              | 6            |
| Portugal       | 0            | 2              | 2            |
| Saudi Arabia   | 0            | 25             | 25           |
| Austria        | 0            | 1              | 1            |
| Brazil         | 0            | 1              | 1            |
| Luxembourg     | 0            | 1              | 1            |
| Norway         | 0            | 1              | 1            |
| Slovakia       | 0            | 1              | 1            |
| Slovenia       | 0            | 1              | 1            |
| Hong Kong      | 0            | 1              | 1            |
| <b>Total</b>   | <b>1998*</b> | <b>3354**</b>  | <b>5352</b>  |

\*The number was calculated by 5615 (total) - 3647 (hPSCreg or eagle-i or unknown country) + 30 (dual country) = 1998.

\*\*The number was calculated by 3360 (total) - 6 (synonyms) = 3354

**Table S4. Statistics of cell line types based on country (as of December 6, 2020).**



**Table S5. Related to Figure 2D.**

| <u>Disease Category in MeSH</u>     | <u>Count of diseases</u> |
|-------------------------------------|--------------------------|
| Urogenital Diseases                 | 26                       |
| Skin and Connective Tissue Diseases | 12                       |
| Others                              | 16                       |
| Nutritional and Metabolic Diseases  | 21                       |
| Nervous System Diseases             | 614                      |
| Neoplasms                           | 16                       |
| Musculoskeletal Diseases            | 52                       |
| Mental Disorders                    | 90                       |
| Male Urogenital Diseases            | 25                       |
| Immune System Diseases              | 15                       |
| Hemic and Lymphatic Diseases        | 26                       |
| Genetic Disorders                   | 179                      |
| Eye Diseases                        | 52                       |
| Endocrine System Diseases           | 108                      |
| Digestive System Diseases           | 3                        |
| Chemically Induced Disorders        | 4                        |
| Cardiovascular Diseases             | 107                      |
| <b>Total</b>                        | <b>1366</b>              |

**Table S5. Statistics of diseased cell lines based on disease category (as of December 6, 2020).**

## **EXPERIMENTAL PROCEDURES**

### **Generation of Fig. 1**

Among all the databases, SKIP and hPSCreg provided details of countries from which data were acquired. For SKIP, this information was provided on its homepage ([skip.stemcellinformatics.org/en/](http://skip.stemcellinformatics.org/en/)). For hPSCreg, country information for every cell line could be accessed from its homepage (<https://hpscereg.eu/>) by clicking “find by location”.

### **Generation of Fig. 2**

Full information data were directly downloaded from ICSCB results page (Table S1) and filtered according to the following criteria: (A) stem cell type (Table S2); (B) health/disease status (Table S3); (C) country (Table S4); and (D) disease (Table S5). Disease categories were determined by search results with keywords under the “Disease Category” in NCBI MeSH page (<https://www.ncbi.nlm.nih.gov/mesh>). For example, searching with keywords of “Parkinson disease” will lead to the MeSH term “Nervous System Diseases” under the “Disease Category”. Pie charts and bar graphs were produced by R (graph.r) using the package “plotly”.
